# Supplementary material for: Improved electrochemical performance of graphene oxide via copper ion cross-linking and plasma functionalization
Source: Royal Society of Chemistry journal article supplement (doi:10.1039/d4tc04915b), 2025-01-01
Supplement: d4tc04915b1.pdf [file d4tc04915b1.pdf]

## Support Information

*Wenqi Zhao, Minghui Cui, Yansong Zhou, Yanjing Liu, Qiongrong Ou\*, Shuyu Zhang\**

State Key Laboratory of Photovoltaic Science and Technology, Institute for Electric Light Sources,  
School of Information Science and Technology, Fudan University, Shanghai, 200433, China.

E-mail addresses: [qrou@fudan.edu.cn](mailto:qrou@fudan.edu.cn) (Q. Ou), [zhangshuyu@fudan.edu.cn](mailto:zhangshuyu@fudan.edu.cn) (S. Zhang).

---

\*Qiongrong Ou. E-mail address: [qrou@fudan.edu.cn](mailto:qrou@fudan.edu.cn)

\*Shuyu Zhang. E-mail address: [zhangshuyu@fudan.edu.cn](mailto:zhangshuyu@fudan.edu.cn)

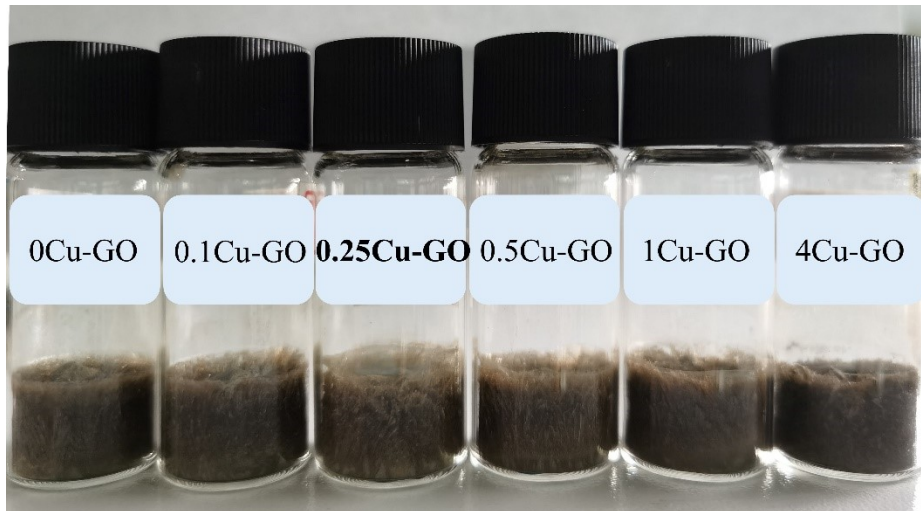

**Fig. S1.** Digital photo of freeze-dried xCu-GO with the same volume of solution.

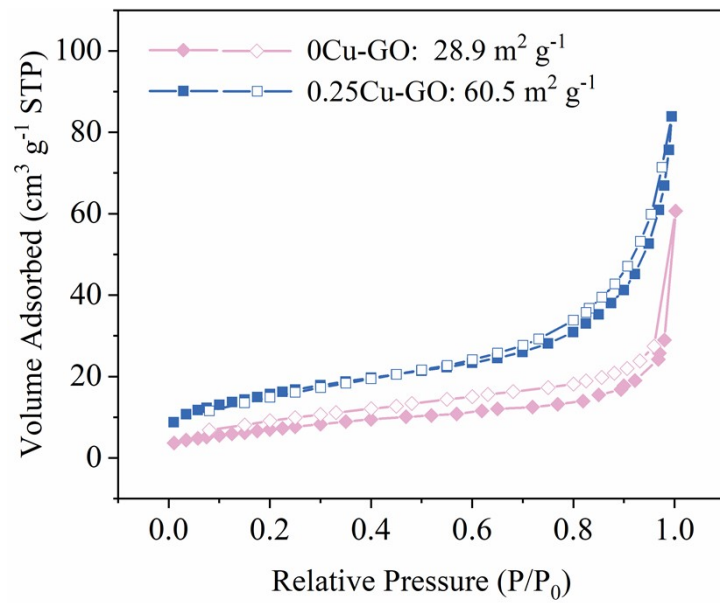

**Fig. S2.** N<sub>2</sub> adsorption-desorption isotherms of 0Cu-GO and 0.25Cu-GO.

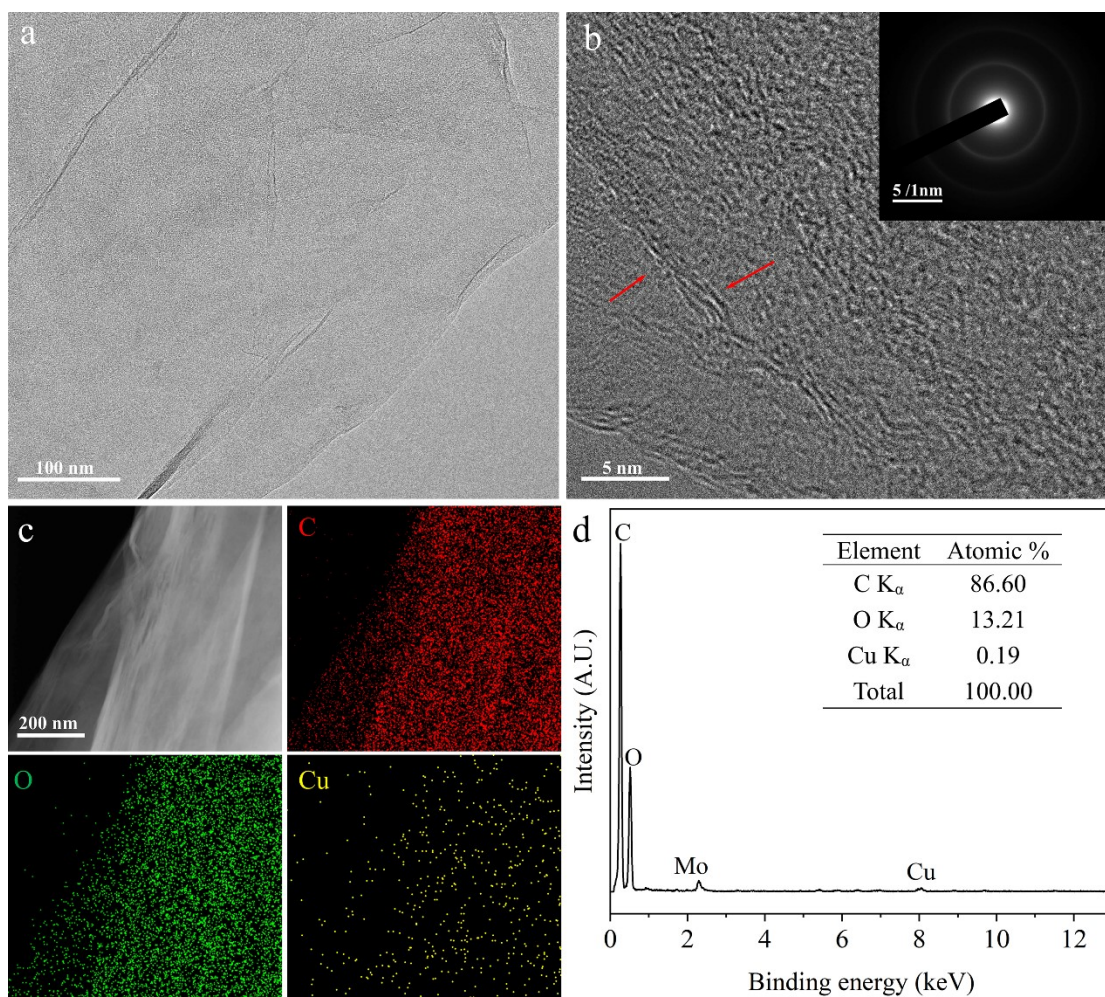

**Fig. S3.** (a) TEM image of 0.25Cu-GO. (b) HRTEM image of 0.25Cu-GO (the inset in b is the SAED pattern). (c) High-angle annular dark-field scanning transmission electron microscopy (HAADF-STEM) image and the corresponding elemental mapping of 0.25Cu-GO. (d) EDX spectrum measured during TEM analysis.

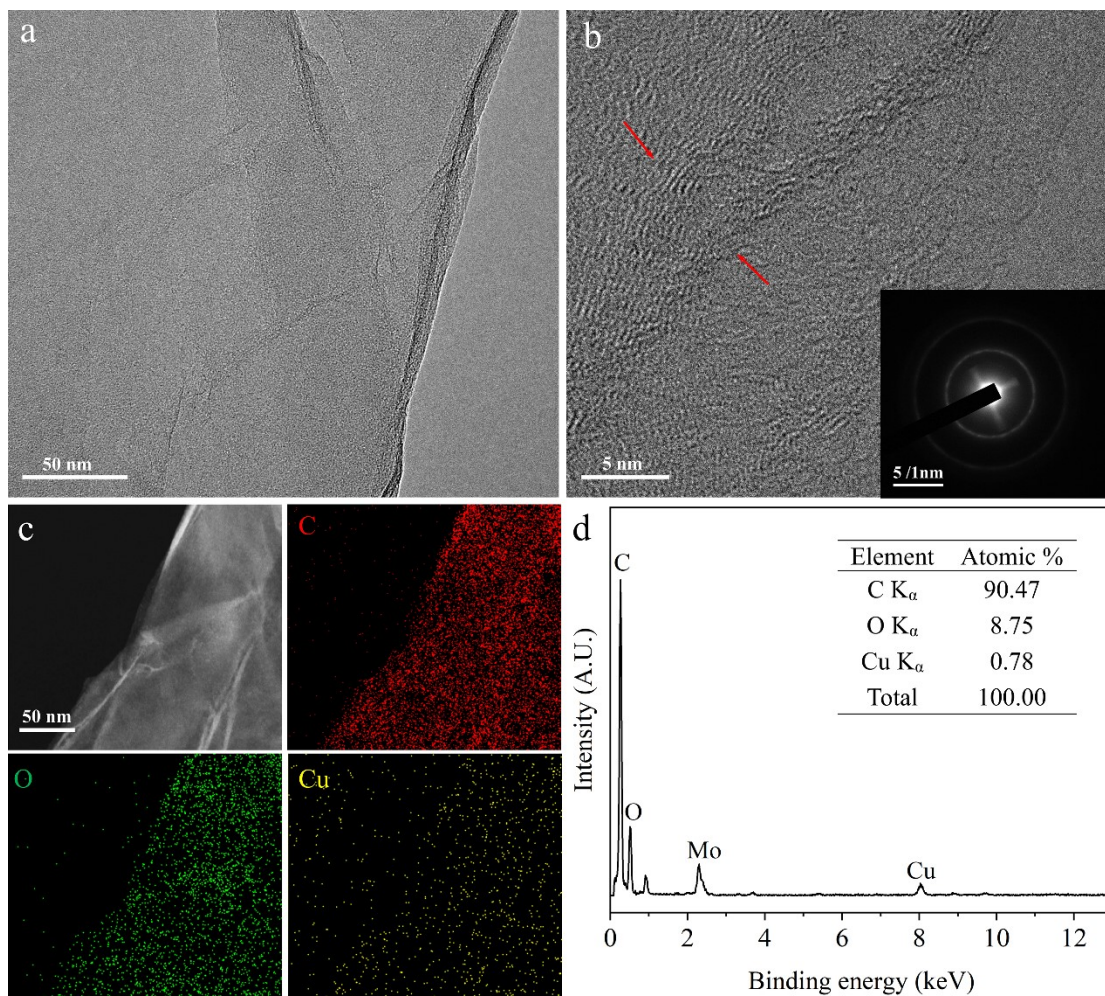

**Fig. S4.** (a) TEM image of 4Cu-GO. (b) HRTEM image of 4Cu-GO (the inset in b is the SAED pattern). (c) HAADF-STEM image and the corresponding elemental mapping of 4Cu-GO. (d) EDX spectrum measured during TEM analysis.

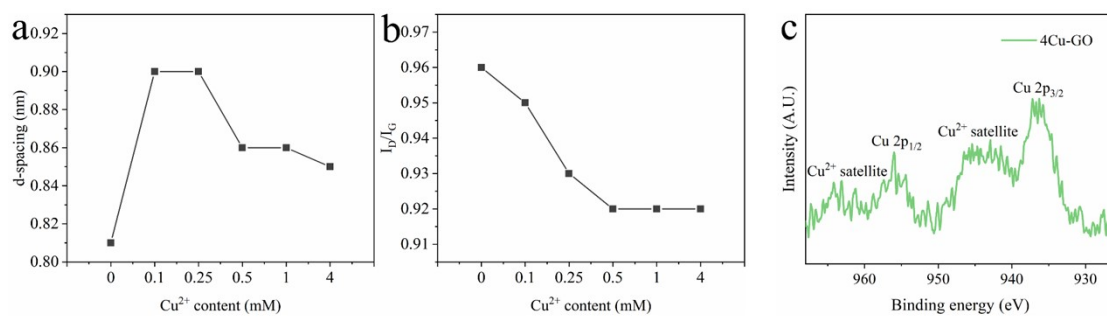

**Fig. S5.** (a) d-spacing of xCu-GO as a function of Cu<sup>2+</sup> content. (b) The I<sub>D</sub>/I<sub>G</sub> value of xCu-GO Raman spectra as a function of Cu<sup>2+</sup> content. (c) Cu 2p XPS spectra of 4Cu-GO.

**Table S1.** Components of C1s spectra of 0Cu-GO and 0.25Cu-GO (relative atomic percentage %)

|           | C    | O    | C-C/C=C | C-O  | C=O | O-C=O |
|-----------|------|------|---------|------|-----|-------|
| 0Cu-GO    | 67.4 | 32.6 | 43.9    | 47.2 | 5.7 | 3.2   |
| 0.25Cu-GO | 69.5 | 30.5 | 47.3    | 44.8 | 5.4 | 2.5   |

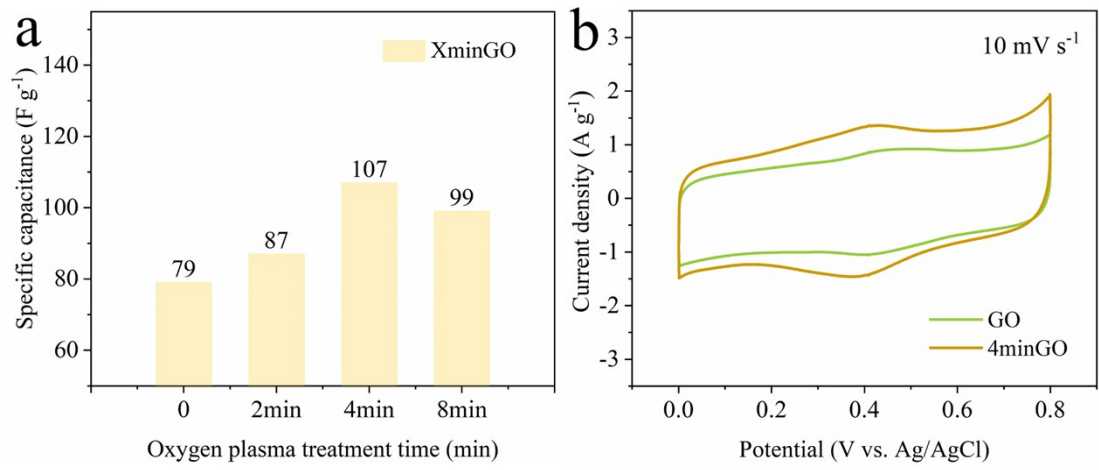

**Fig. S6.** (a) The specific capacitance at 1.5 A g<sup>-1</sup> for XminGO. (b) CV curves of GO and 4minGO at 10 mV<sup>-1</sup>.



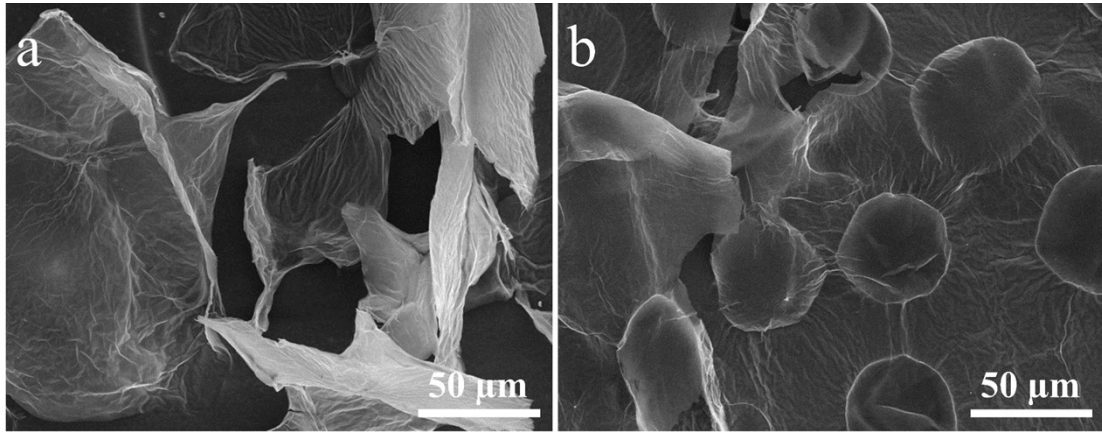

**Fig. S7.** SEM images of (a) 4minGO, and (b) 8minGO.

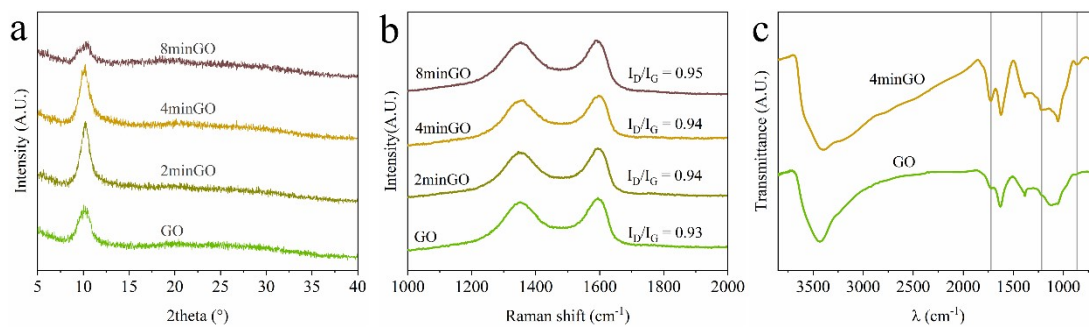

**Fig. S8.** (a) XRD patterns of XminGO. (b) Raman spectra of XminGO. (c) FTIR spectra of GO and 4minGO.

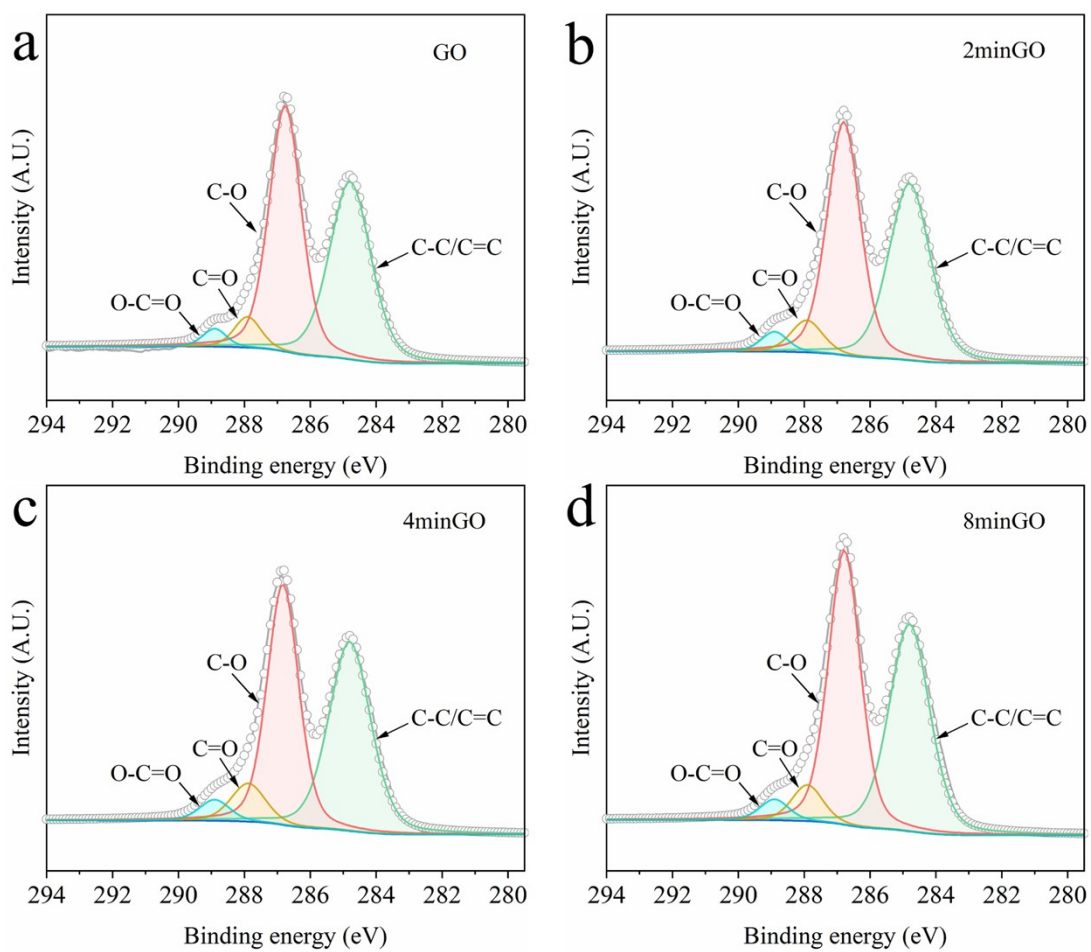

**Fig. S9.** C 1s XPS spectra of (a) GO, (b) 2minGO, (c) 4minGO, and (d) 8minGO.

**Table S2.** Components of C1s spectra of XminGO (relative atomic percentage %)

|        | C    | O    | C-C/C=C | C-O  | C=O | O-C=O |
|--------|------|------|---------|------|-----|-------|
| GO     | 66.3 | 33.7 | 43.4    | 48   | 5.7 | 2.9   |
| 2minGO | 67   | 33.1 | 44.1    | 46.6 | 6.1 | 3.2   |
| 4minGO | 67.6 | 32.6 | 45.4    | 43.5 | 7.5 | 3.6   |
| 8minGO | 67.9 | 32.1 | 44.5    | 46.4 | 5.9 | 3.2   |

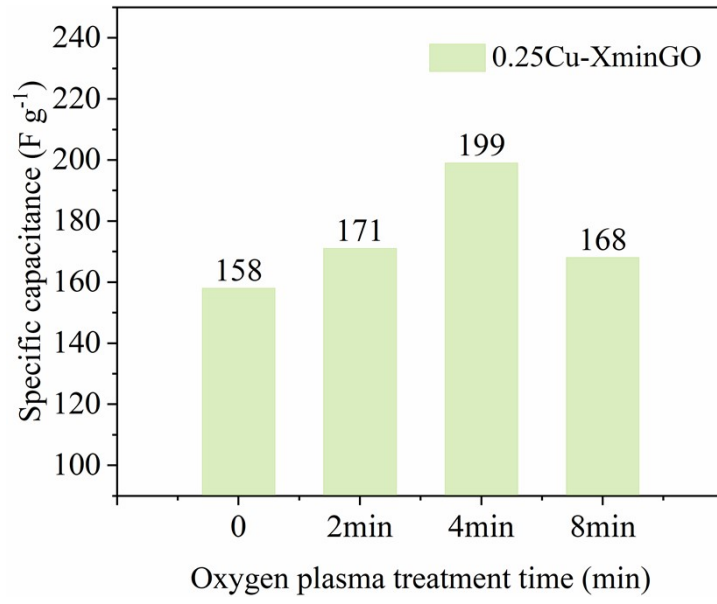

**Fig. S10.** The specific capacitance at 1.5 A g<sup>-1</sup> for 0.25Cu-XminGO.

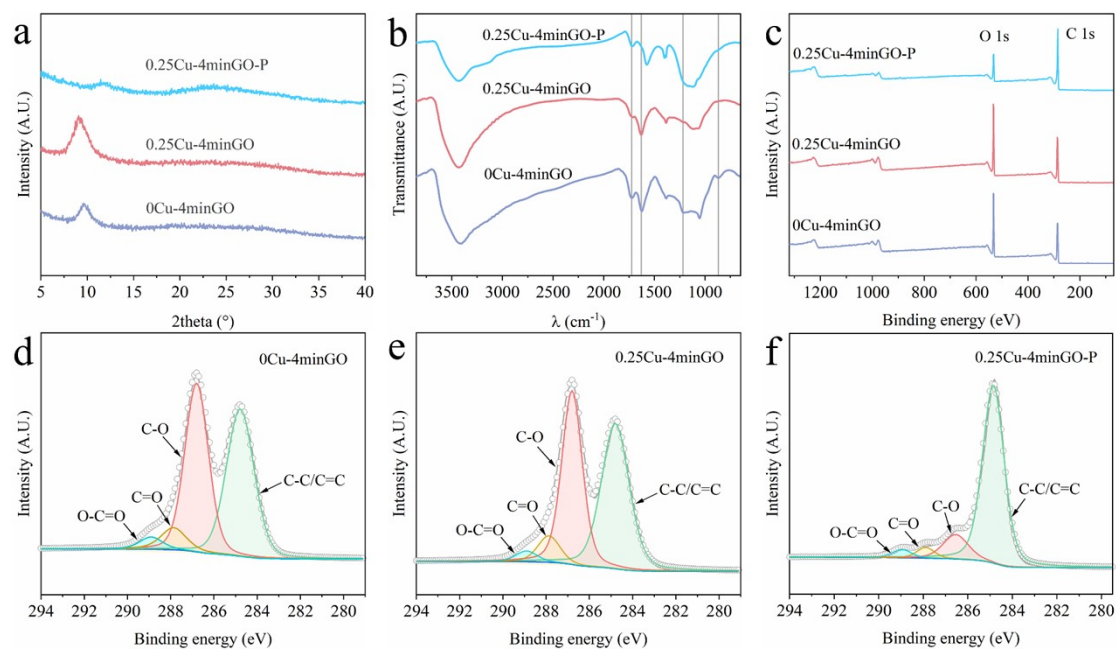

**Fig. S11.** (a) XRD patterns of 0Cu-4minGO and 0.25Cu-4minGO/0.25Cu-4minGO-P. (b) FTIR spectra of 0Cu-4minGO and 0.25Cu-4minGO/0.25Cu-4minGO-P. (c) XPS survey spectra of 0Cu-4minGO and 0.25Cu-4minGO/0.25Cu-4minGO-P. C 1s XPS spectra of (d) 0Cu-4minGO, (e) 0.25Cu-4minGO, and (f) 0.25Cu-4minGO-P.

**Table S3.** Components of C1s spectra of (relative atomic percentage %) 0Cu-4minGO and 0.25Cu-4minGO/0.25Cu-4minGO-P

|                 | C    | O    | C-C/C=C | C-O  | C=O | O-C=O |
|-----------------|------|------|---------|------|-----|-------|
| 0Cu-4minGO      | 68.7 | 31.3 | 45.3    | 44.2 | 7.1 | 3.4   |
| 0.25Cu-4minGO   | 69.1 | 30.9 | 47.9    | 42.4 | 7.0 | 2.7   |
| 0.25Cu-4minGO-P | 83.2 | 16.8 | 81.6    | 12.2 | 3.2 | 3.0   |

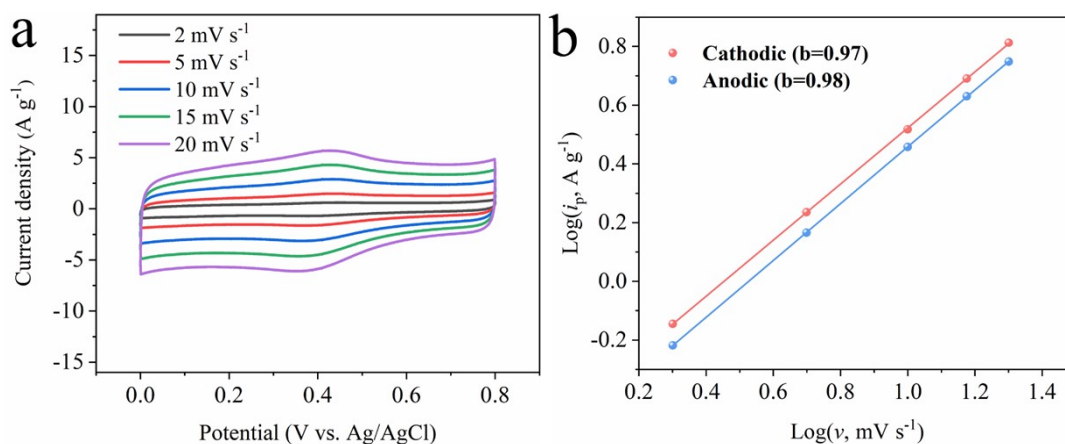

**Fig. S12.** (a) CV curves of 0.25Cu-4minGO-P at different scan rates. (b) The fitting plots between  $\log(i)$  and  $\log(v)$  of the redox peaks around 0.4 V.

The electrochemical reaction kinetics of the material is investigated according to the equation:  $i_p = av^b$ , where  $i_p$  is the peak current (A),  $v$  is the scan rate ( $\text{mV}\cdot\text{s}^{-1}$ ), and  $a$  and  $b$  are constants. By fitting plots between  $\log(i)$  and  $\log(v)$  at low scan rates, as Fig. S12 shows, the  $b$  values of the redox peaks are calculated to be approximately 1, which indicates a capacitive-controlled mechanism during the charge storage process.



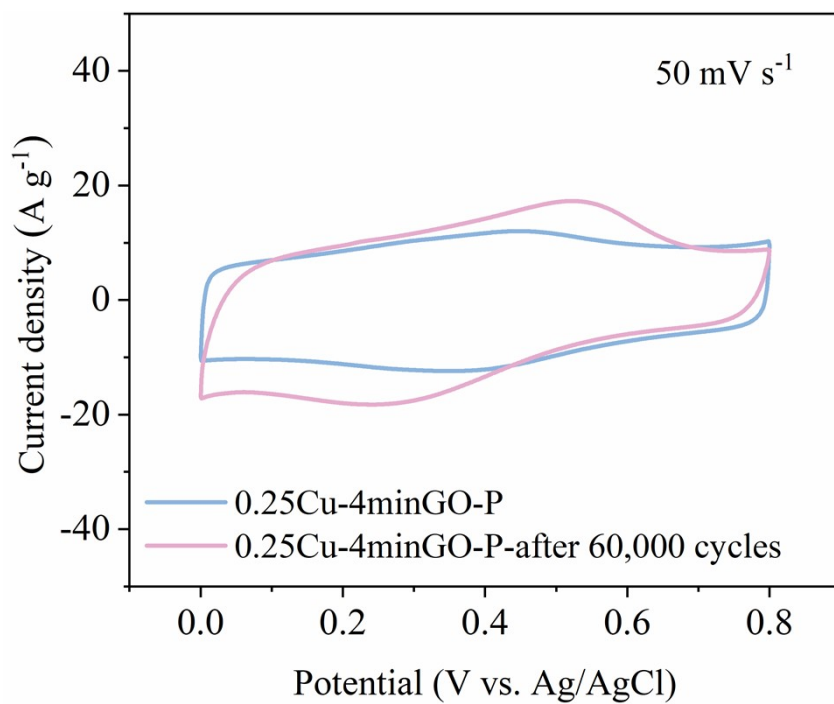

**Fig. S13.** CV curves of 0.25Cu-4minGO-P and after 60,000 cycles at 50 mV s<sup>-1</sup>.

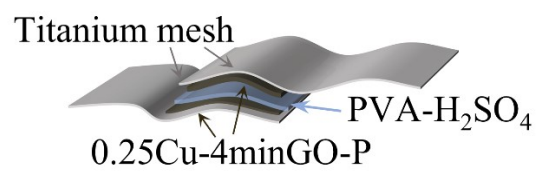

**Fig. S14.** Schematic illustration of an all-solid-state symmetric supercapacitor.
